# Supplementary material
Source: publisher figshare collection journal article supplement (https://gsapubs.figshare.com/ndownloader/files/23293466)
Supplement: Supplementary file 1 [file 23293466]

## Supporting Online Information

**Additional Methods**

Thermo-gravimetric analyses were carried out using a Netzsch STA 449 C thermobalance apparatus. Powdered samples (of approximately 40 mg) were heated in an air atmosphere in a Pt crucible (with lid) at a heating rate of 10°C/min up to a temperature of 100°C. The samples were then left at 100°C for 60 minutes, to ensure they were completely dry. Samples were then heated to a target temperature of 1000°C, again at 10°C/min.

X-ray diffraction (XRD) was performed in transmission geometry on a Stoe Kristalloflex diffractometer (CuK $\alpha$ 1-radiation  $\lambda = 1.544056 \text{ \AA}$ , curved Ge (111) monochromator).

Optical microscopy was performed using a Leica DM2500 (equipped for both transmitted and reflected light) microscope with a mounted 5 megapixel Leica DFC425 digital camera.
